# Supplementary material for: Three-Year Variations in Criteria Atmospheric Pollutants and Their Relationship with Rainwater Chemistry in Karst Urban Region, Southwest China
Source: MDPI journal article supplement (doi:10.3390/atmos12081073), 2021-08-21
Supplement: s1 [file s1]

Archive with 1 entries (1 files):
- atmosphere-1306704-supplementary.pdf
