# Supplementary material for: Three-Year Variations in Criteria Atmospheric Pollutants and Their Relationship with Rainwater Chemistry in Karst Urban Region, Southwest China
Source: MDPI journal article supplement (doi:10.3390/atmos12081073), 2021-08-21
Supplement: s1 [file s1 › atmosphere-1306704-supplementary.pdf]

Supplementary

# Three-Year Variations in Criteria Atmospheric Pollutants and Their Relationship with Rainwater Chemistry in Karst Urban Region, Southwest China

Jie Zeng <sup>1</sup>, Xin Ge <sup>2</sup>, Qixin Wu <sup>2,\*</sup> and Shitong Zhang <sup>1</sup>

<sup>1</sup> Institute of Earth Sciences, China University of Geosciences (Beijing), Beijing 100083, China; zengjie@cugb.edu.cn (J.Z.); stongzhang0103@edu.cn (S.Z.)

<sup>2</sup> Key Laboratory of Karst Georesources and Environment, Ministry of Education, College of Resources and Environmental Engineering, Guizhou University, Guiyang 500025, China; april\_gexin@163.com

\* Correspondence: qxwu@gzu.edu.cn

**Table S1.** The annual mean contents of atmospheric pollutants and the Grade II standard values of CAAQS II and CAAQS III.

|                   | Unit              | CAAQS II-Grade II standard | CAAQS III-Grade II standard | 2013 | 2014 | 2015 |
|-------------------|-------------------|----------------------------|-----------------------------|------|------|------|
| SO <sub>2</sub>   | µg/m <sup>3</sup> | 60                         | 60                          | 30   | 23   | 17   |
| NO <sub>2</sub>   | µg/m <sup>3</sup> | 40                         | 40                          | 32   | 29   | 26   |
| CO                | mg/m <sup>3</sup> | 4                          | 4                           | 0.78 | 0.77 | 0.70 |
| PM <sub>2.5</sub> | µg/m <sup>3</sup> | -                          | 35                          | 51   | 46   | 38   |
| PM <sub>10</sub>  | µg/m <sup>3</sup> | 100                        | 70                          | 81   | 70   | 58   |
